# Supplementary material for: Association Between the Cool Temperature-dependent Suppression of Colonic Peristalsis and Transient Receptor Potential Melastatin 8 Activation in Both a Randomized Clinical Trial and an Animal Model
Source: PubMed Central journal article supplement — J Neurogastroenterol Motil. 2022 Oct 30;28(4):693–705. doi: 10.5056/jnm21198 (PMC9577569; doi:10.5056/jnm21198), 2022-10-30
Supplement: jnm-28-4-693-supple.pdf [file jnm-28-4-693-supple.pdf]

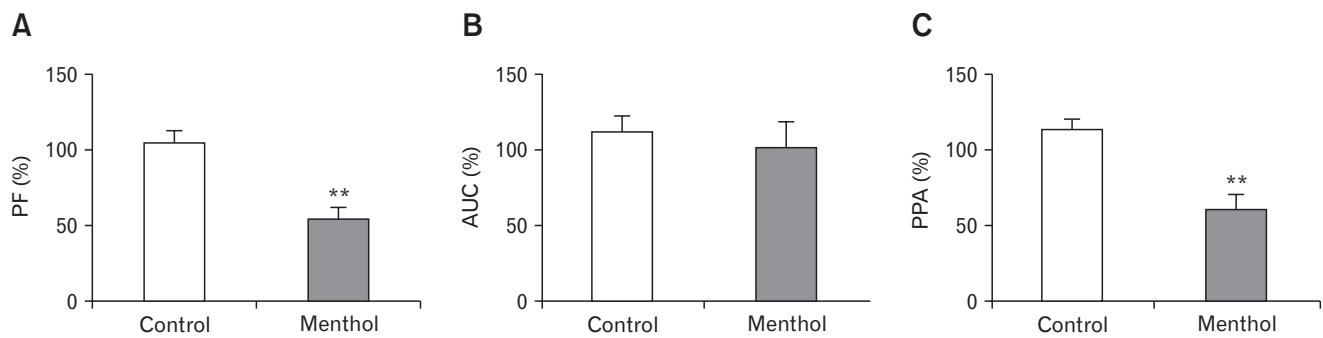

**Supplementary Figure.** Suppression of peak frequency (PF) and peak pressure amplitude (PPA) after the administration of menthol in rats. (A) Decreased ratio of peak frequency (PF) in high-amplitude pressure following administration of menthol. To quantify the decrease in high-amplitude pressure induced by menthol, the ratio of contraction frequency before and after administration with a length of more than 8 mm was calculated as the %PF. **\*\*P** < 0.01 vs control saline. (B) The area under the curve (AUC) at high-amplitude pressure with 5°C saline. The AUC was calculated before and after drug administration using the lowest intraluminal pressure value as the baseline. There were no significant differences between the menthol and control groups. (C) The results of the peak pressure amplitude (PPA) at high-amplitude pressure with menthol. The difference between the PPA and the lowest intraluminal pressure was defined as the PPA, and the ratio of the PPAs before and after medication was calculated as %PPA. **\*\*P** < 0.01 vs control saline.

## Supplementary Videos

**Supplementary Video 1.** Rat colon. Effect of saline 25°C.

**Supplementary Video 2.** Rat colon. Effect of saline 15°C.

**Supplementary Video 3.** Rat colon. Effect of saline 5°C.

**Supplementary Video 4.** Wild-type mouse colon. Effect of saline 25°C.

**Supplementary Video 5.** Wild-type mouse colon. Effect of saline 5°C.

**Supplementary Video 6.** Transient receptor potential melastatin 8-deficient (TRPM8<sup>-/-</sup>) mouse colon. Effect of saline 25°C.

**Supplementary Video 7.** Transient receptor potential melastatin 8-deficient (TRPM8<sup>-/-</sup>) mouse colon. Effect of saline 5°C.
